# Supplementary material for: ER-phagy mediates selective degradation of endoplasmic reticulum independently of the core autophagy machinery
Source: PubMed Central journal article supplement (PMC4163648; doi:10.1242/jcs.154716), 2014-09-15
Supplement: supp_127.18.4078_JCS154716.pdf [file supp_127.18.4078_JCS154716.pdf]

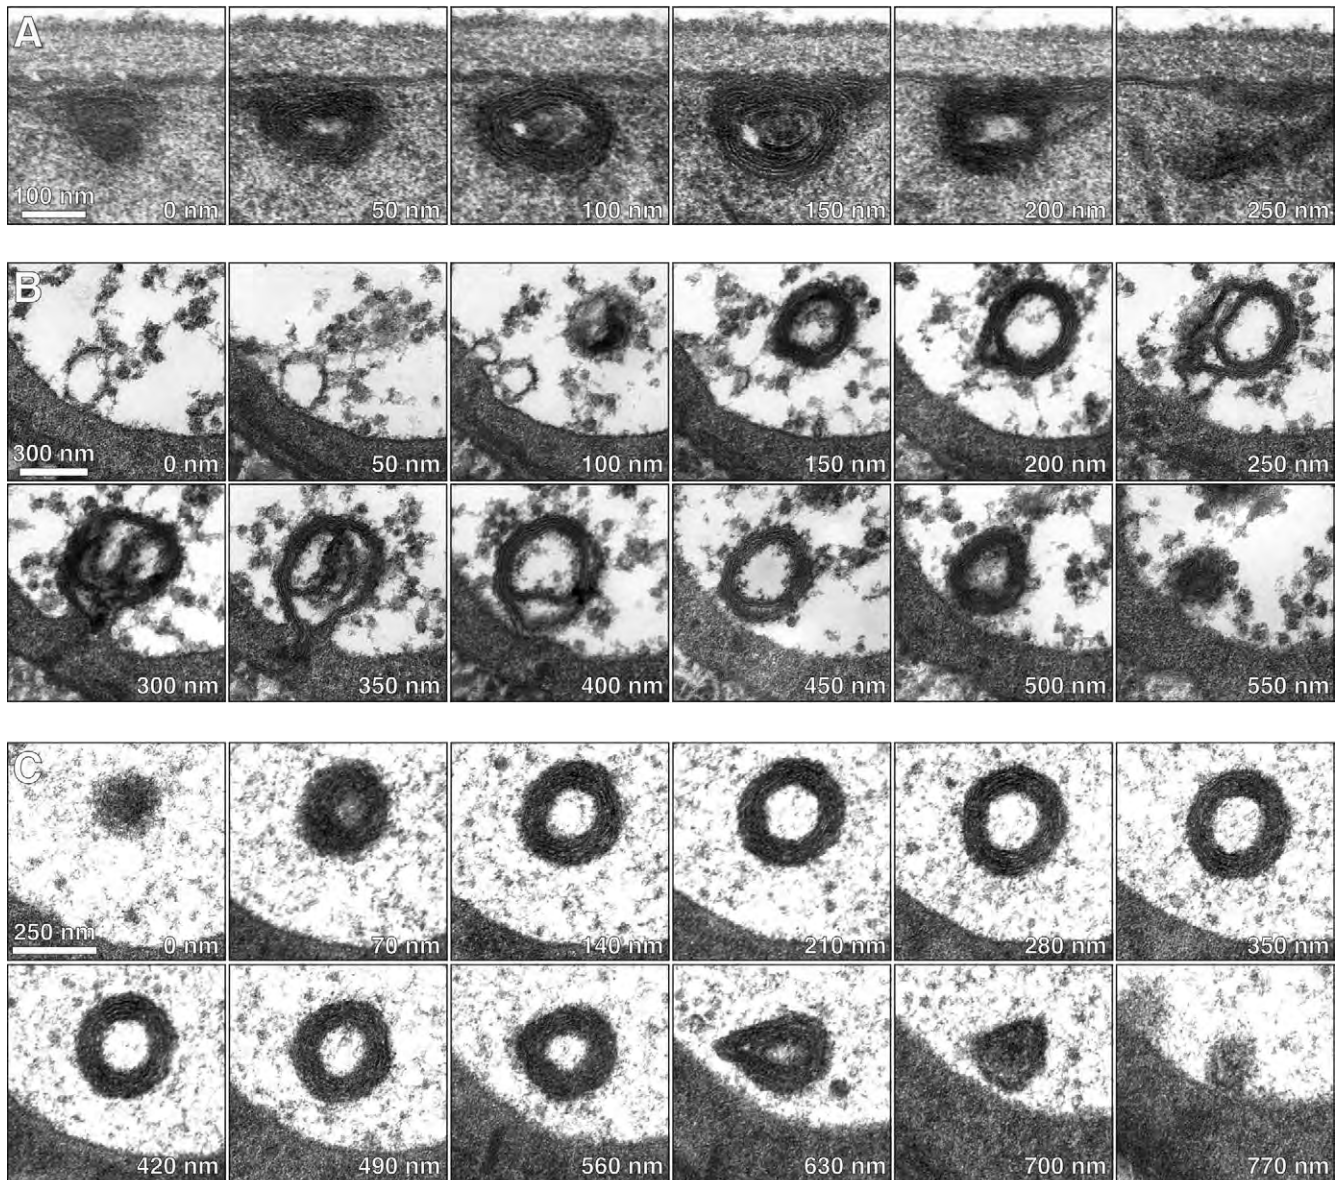

**Fig. S1.** Stages of autophagy of ER whorls. **(A)** Electron micrographs of serial 50 nm thin sections showing an ER whorl underneath the plasma membrane. **(B)** Electron micrographs of serial 50 nm thin sections showing an ER whorl in the vacuole that is still connected to the cortical ER through a narrow neck (visible in sections 300 nm and 350 nm). The micrograph of section 350 nm is a lower magnification image of Figure 1F. **(C)** Electron micrographs of serial 70 nm thin sections showing an ER whorl in the vacuole that is disconnected from the cytosol.

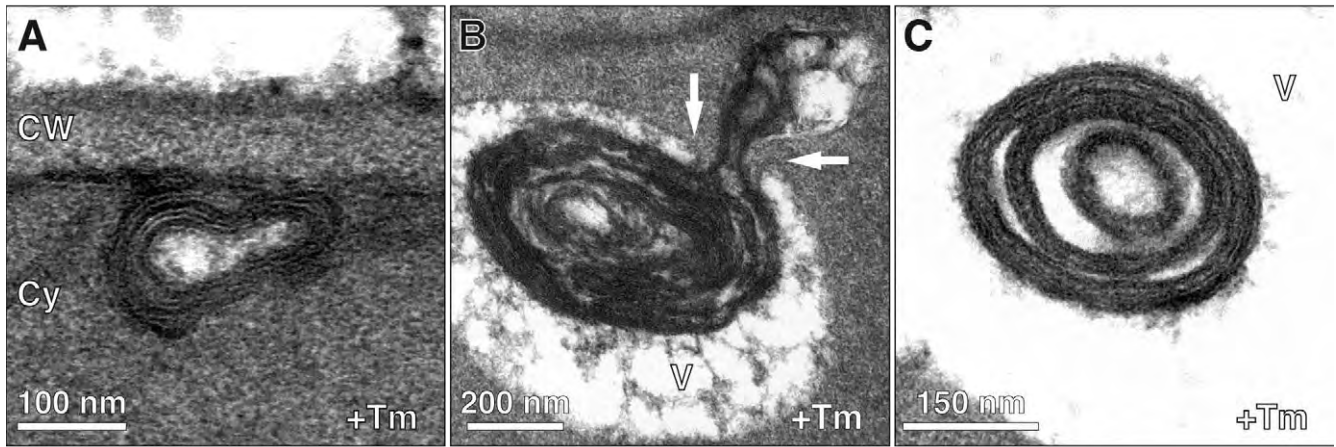

**Fig. S2.** Autophagy of ER whorls upon tunicamycin treatment. Electron micrographs of wild-type yeast treated with tunicamycin for 4 h, illustrating **(A)** ER whorl formation at the cell cortex, **(B)** uptake into the vacuole by invagination of the vacuolar membrane (white arrows), and **(C)** completed import into the vacuole. CW, cell wall; Cy, cytoplasm; Tm, tunicamycin; V, vacuole.



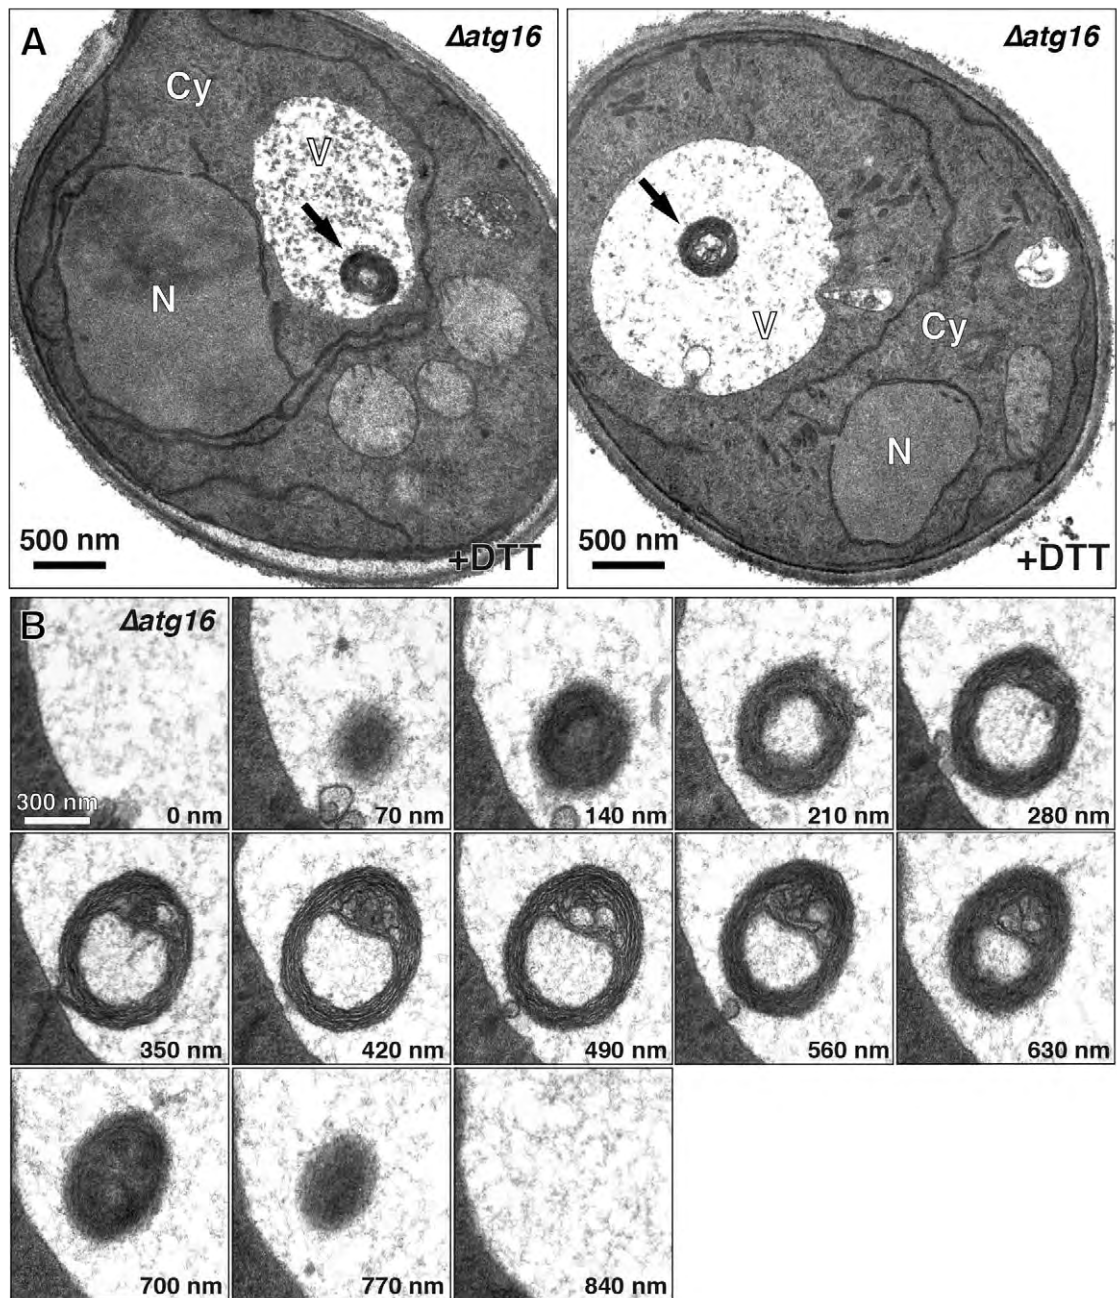

**Fig. S3.** Autophagy of ER whorls does not require key *ATG* genes. **(A, B)** Low magnification electron micrographs of ER whorls (black arrows) in the vacuoles of  $\Delta atg16$  cells treated with DTT for 3 h. **(C)** Electron micrographs of serial 70 nm thin sections showing an ER whorl that has been taken up into the vacuole of a  $\Delta atg16$  cell treated with DTT for 3 h. Cy, cytoplasm; N, nucleus; V, vacuole.

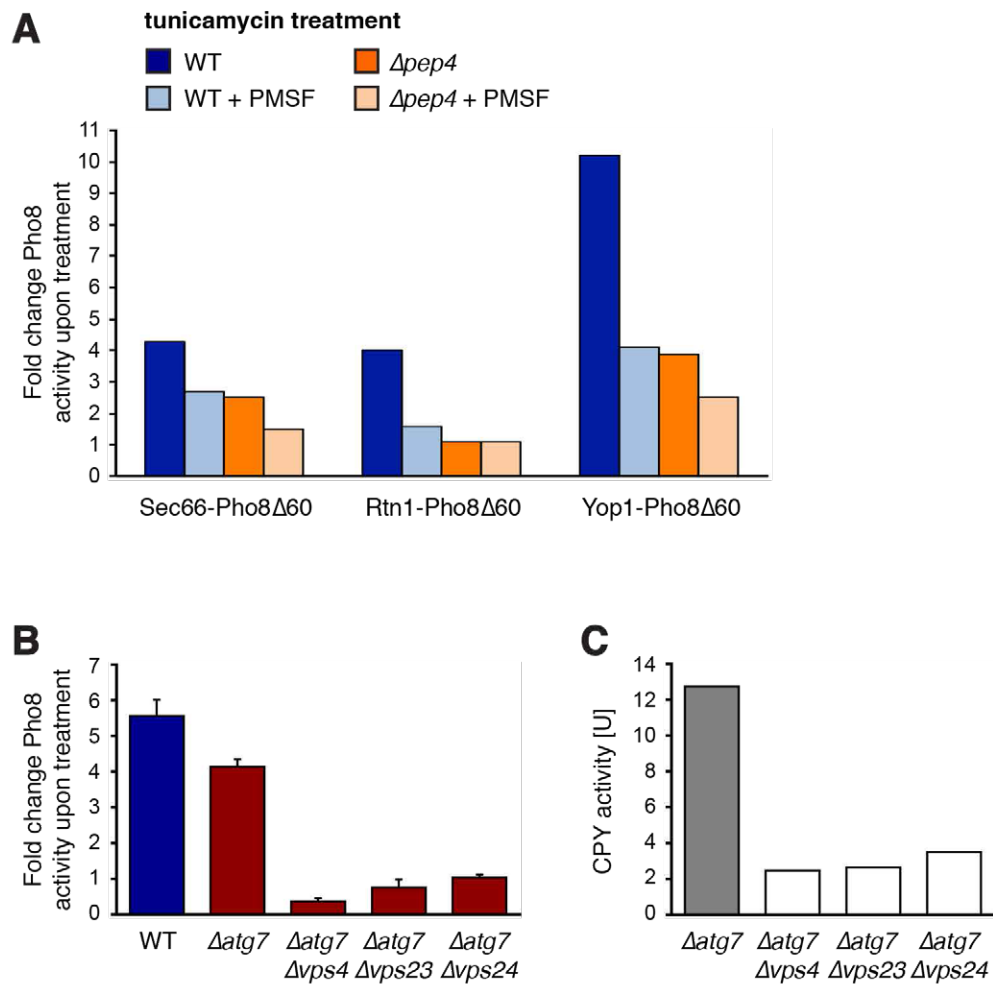

**Fig. S4.** Impairment of ER-localized Pho8 $\Delta$ 60 reporter activation and CPY activity in *pep4* and ESCRT mutants. **(A)** Fold change of Pho8 activity of Sec66-Pho8 $\Delta$ 60, Rtn1-Pho8 $\Delta$ 60, Yop1-Pho8 $\Delta$ 60 upon tunicamycin treatment in wild-type (WT) cells (blue bars) and  $\Delta pep4$  cells (orange bars) without and with additional PMSF treatment (dark and light bars, respectively). **(B)** Fold change of Pho8 activity of Yop1-Pho8 $\Delta$ 60 after tunicamycin treatment in WT cells (blue bar) and  $\Delta atg7$  cells with or without additional deletion of *VPS4*, *VPS23* or *VPS24* (red bars). Data are mean  $\pm$  SEM, n = 3. **(C)** CPY activity in enzyme units U in  $\Delta atg7$  cells (grey bar) and cells with additional deletion of *VPS4*, *VPS23* or *VPS24* (white bars).

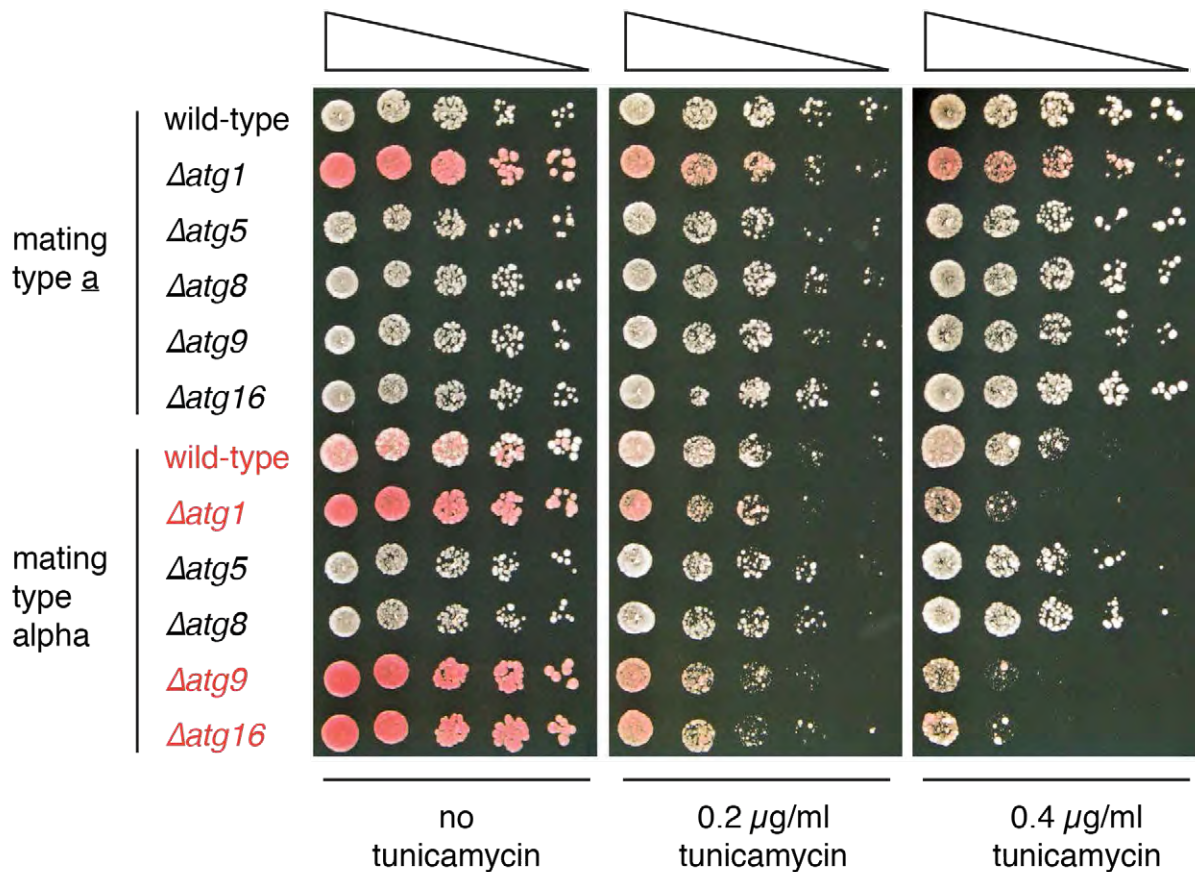

**Fig. S5.** Deletion of autophagy genes does not impair growth in the presence of tunicamycin. Exponentially growing wild-type and *atg* mutant cells were serially diluted in 4-fold dilution steps, spotted onto YPD plates containing tunicamycin at the concentrations indicated and grown for 2 days (no and 0.2  $\mu\text{g/ml}$  tunicamycin) or 4 days (0.4  $\mu\text{g/ml}$  tunicamycin) at 30°C. Strains marked in red were derived previously (Bernales *et al.*, 2006). All mating type  $\alpha$  strains grew equally well under all conditions. The mating type alpha wild-type strain grew more slowly on tunicamycin plates than the mating type  $\alpha$  wild-type strain. The previously used mating type alpha  $\Delta atg1$ ,  $\Delta atg9$  and  $\Delta atg16$  mutants grew worse at high tunicamycin concentrations than the corresponding wild-type, as reported by Bernales *et al.*, 2006. However, the newly derived mating type alpha  $\Delta atg5$  and  $\Delta atg8$  mutants grew better on tunicamycin than both the previously used *atg* mutants and the mating type alpha wild-type. Qualitatively similar results were obtained with higher tunicamycin concentrations, growth at 37°C or a combination of both. These observations indicate that the growth differences observed by Bernales *et al.*, 2006 are unrelated to deletions of core autophagy genes, all of which are functionally equivalent. A possible explanation is provided by the observations that the mating type alpha wild-type is a mixture of white and red colonies, that the previously used *atg* mutants are uniformly red whereas the newly derived *atg* mutants are uniformly white, and that the growth phenotypes segregate with the red colour. The red colour arises through mutation of the *ADE2* gene, which leads to accumulation of toxic red intermediates of adenin biosynthesis that impede growth. The white colonies have acquired suppressor mutations that prevent accumulation of the toxic red pigments. Hence, the mating type alpha wild-type and *atg* mutant strains used previously are not isogenic and their different growth behaviours on tunicamycin-containing plates is likely caused by mutations in the adenin biosynthesis pathway.

**Table S1. Plasmids used in this study.**

| Plasmid                             | Source                          |
|-------------------------------------|---------------------------------|
| pRS316-GFPAtg8                      | Suzuki et al., 2001             |
| pFA6a-GFP(S65T)-<br>kanMX6          | Longtine et al., 1998           |
| pFA6a-Pho8 $\Delta$ 60-kanMX6       | this study                      |
| pCC4                                | Campbell and Thorsness,<br>1998 |
| pRS306                              | Sikorski and Hieter, 1989       |
| p306-ADH-CoxIV-<br>Pho8 $\Delta$ 60 | this study                      |
| pFA6a-GFP(S65T)-<br>His3MX6         | Longtine et al., 1998           |
| YIplac-ssDsRedHDEL-<br>NatMX        | Madrid et al., 2006             |
| YIplac-ssGFPHDEL-<br>NatMX          | this study                      |

**Table S2. Yeast strains used in this study.**

| Strain | Relevant genotype                                   | Source            |
|--------|-----------------------------------------------------|-------------------|
| W303   | <i>leu2-3,112 trp1-1 ura3-1 his3-11,15 mat a</i>    | Walter lab        |
| SSY005 | <i>atg1Δ::kan</i>                                   | this study        |
| SSY013 | <i>atg7Δ::kan</i>                                   | this study        |
| SSY015 | <i>atg8Δ::HIS3</i>                                  | this study        |
| SSY023 | <i>atg16Δ::kan</i>                                  | this study        |
| SSY321 | <i>ego1Δ::HIS3</i>                                  | this study        |
| SSY322 | <i>ego3Δ::HIS3</i>                                  | this study        |
| SSY323 | <i>vtc4Δ::HIS3</i>                                  | this study        |
| SSY324 | <i>nyj1Δ::HIS3</i>                                  | this study        |
| PWY005 | <i>pep4Δ::TRP1</i>                                  | this study        |
| SSY003 | <i>vps4Δ::HIS3</i>                                  | this study        |
| SSY058 | <i>vps23Δ::HIS3</i>                                 | this study        |
| SSY071 | pRS316-GFPATG8                                      | this study        |
| SSY072 | <i>atg7Δ::kan</i> pRS316-GFPATG8                    | this study        |
| SSY073 | <i>pep4Δ::TRP1</i> pRS316-GFPATG8                   | this study        |
| SSY139 | <i>SEC63-GFP::HIS3 VPH1-cherry::TRP1</i>            | Schuck et al 2009 |
| SSY243 | <i>SEC63-GFP::HIS3 VPH1-cherry::TRP1 atg7Δ::kan</i> | this study        |
| SSY244 | <i>SEC63-GFP::HIS3 VPH1-cherry::kan pep4Δ::TRP1</i> | this study        |
| SSY228 | <i>RTN1-GFP::TRP1</i>                               | this study        |
| SSY273 | <i>RTN1-GFP::TRP1 atg7Δ::kan</i>                    | this study        |
| SSY274 | <i>RTN1-GFP::TRP1 pep4Δ::kan</i>                    | this study        |
| SSY605 | <i>pho8Δ::HIS3 pho13Δ::TRP</i>                      | this study        |
| SSY609 | <i>pho8Δ::HIS3 pho13Δ::TRP atg7Δ::nat</i>           | this study        |
| SSY610 | <i>pho8Δ::HIS3 pho13Δ::TRP pep4Δ::nat</i>           | this study        |
| SSY614 | <i>pho13Δ::HIS3 P<sub>GPD</sub>-pho8Δ60::kan</i>    | this study        |



| Strain | Relevant genotype                                                             | Source     |
|--------|-------------------------------------------------------------------------------|------------|
| SSY615 | <i>pho13Δ::HIS3 P<sub>GPD</sub>-pho8Δ60::kan atg7Δ::nat</i>                   | this study |
| SSY616 | <i>pho13Δ::HIS3 P<sub>GPD</sub>-pho8Δ60::kan pep4Δ::nat</i>                   | this study |
| SSY627 | <i>pho8Δ::HIS3 pho13Δ::TRP URA3::P<sub>ADH</sub>-COXIV-pho8Δ60</i>            | this study |
| SSY628 | <i>pho8Δ::HIS3 pho13Δ::TRP atg7Δ::nat URA3::P<sub>ADH</sub>-COXIV-pho8Δ60</i> | this study |
| SSY613 | <i>pho8Δ::HIS3 pho13Δ::TRP SEC63-pho8Δ60::kan</i>                             | this study |
| SSY617 | <i>pho8Δ::HIS3 pho13Δ::TRP SEC63-pho8Δ60::kan atg7Δ::nat</i>                  | this study |
| SSY630 | <i>pho8Δ::HIS3 pho13Δ::TRP SEC66-pho8Δ60::kan</i>                             | this study |
| SSY641 | <i>pho8Δ::HIS3 pho13Δ::TRP SEC66-pho8Δ60::kan atg7Δ::nat</i>                  | this study |
| SSY642 | <i>pho8Δ::HIS3 pho13Δ::TRP SEC66-pho8Δ60::kan pep4Δ::nat</i>                  | this study |
| SSY612 | <i>pho8Δ::HIS3 pho13Δ::TRP RTN1-pho8Δ60::kan</i>                              | this study |
| SSY634 | <i>pho8Δ::HIS3 pho13Δ::TRP RTN1-pho8Δ60::kan atg7Δ::nat</i>                   | this study |
| SSY635 | <i>pho8Δ::HIS3 pho13Δ::TRP RTN1-pho8Δ60::kan pep4Δ::nat</i>                   | this study |
| SSY611 | <i>pho8Δ::HIS3 pho13Δ::TRP YOP1-pho8Δ60::kan</i>                              | this study |
| SSY621 | <i>pho8Δ::HIS3 pho13Δ::TRP YOP1-pho8Δ60::kan atg7Δ::nat</i>                   | this study |
| SSY622 | <i>pho8Δ::HIS3 pho13Δ::TRP YOP1-pho8Δ60::kan pep4Δ::nat</i>                   | this study |
| SSY651 | <i>pho8Δ::HIS3 pho13Δ::TRP YOP1-pho8Δ60::kan atg1Δ::nat</i>                   | this study |
| SSY652 | <i>pho8Δ::HIS3 pho13Δ::TRP YOP1-pho8Δ60::kan atg6Δ::nat</i>                   | this study |
| SSY653 | <i>pho8Δ::HIS3 pho13Δ::TRP YOP1-pho8Δ60::kan atg8Δ::nat</i>                   | this study |
| SSY654 | <i>pho8Δ::HIS3 pho13Δ::TRP YOP1-pho8Δ60::kan atg14Δ::nat</i>                  | this study |
| SSY656 | <i>pho8Δ::HIS3 pho13Δ::TRP YOP1-pho8Δ60::kan atg16Δ::nat</i>                  | this study |
| SSY657 | <i>pho8Δ::HIS3 pho13Δ::TRP YOP1-pho8Δ60::kan atg7Δ::LEU2</i>                  | this study |
| SSY658 | <i>pho8Δ::HIS3 pho13Δ::TRP YOP1-pho8Δ60::kan atg7Δ::LEU2<br/>ego1Δ::nat</i>   | this study |
| SSY659 | <i>pho8Δ::HIS3 pho13Δ::TRP YOP1-pho8Δ60::kan atg7Δ::LEU2<br/>ego3Δ::nat</i>   | this study |
| SSY660 | <i>pho8Δ::HIS3 pho13Δ::TRP YOP1-pho8Δ60::kan atg7Δ::LEU2<br/>vtc4Δ::nat</i>   | this study |



| Strain | Relevant genotype                                                 |                    |                          |                    |                                | Source     |
|--------|-------------------------------------------------------------------|--------------------|--------------------------|--------------------|--------------------------------|------------|
| SSY661 | <i>pho8Δ::HIS3</i>                                                | <i>pho13Δ::TRP</i> | <i>YOP1-pho8Δ60::kan</i> | <i>atg7Δ::LEU2</i> | <i>nvj1Δ::nat</i>              | this study |
| SSY662 | <i>pho8Δ::HIS3</i>                                                | <i>pho13Δ::TRP</i> | <i>YOP1-pho8Δ60::kan</i> | <i>atg7Δ::LEU2</i> | <i>pep4Δ::nat</i>              | this study |
| SSY671 | <i>pho8Δ::HIS3</i>                                                | <i>pho13Δ::TRP</i> | <i>YOP1-pho8Δ60::kan</i> | <i>atg7Δ::LEU2</i> | <i>vps4Δ::nat</i>              | this study |
| SSY672 | <i>pho8Δ::HIS3</i>                                                | <i>pho13Δ::TRP</i> | <i>YOP1-pho8Δ60::kan</i> | <i>atg7Δ::LEU2</i> | <i>vps23Δ::nat</i>             | this study |
| SSY673 | <i>pho8Δ::HIS3</i>                                                | <i>pho13Δ::TRP</i> | <i>YOP1-pho8Δ60::kan</i> | <i>atg7Δ::LEU2</i> | <i>vps24Δ::nat</i>             | this study |
| SSY377 | <i>opi1Δ::kan</i>                                                 |                    |                          |                    |                                | this study |
| SSY060 | <i>pep4Δ::TRP1 prb1Δ::HIS3</i>                                    |                    |                          |                    |                                | this study |
| SSY572 | <i>pep4Δ::TRP1 prb1Δ::HIS3 opi1Δ::kan</i>                         |                    |                          |                    |                                | this study |
| SSY192 | <i>pep4Δ::TRP1 prb1Δ::HIS3 atg7Δ::hph Yiplac-ssGFPHDEL-NatMX6</i> |                    |                          |                    |                                | this study |
| SSY602 | <i>pep4Δ::TRP1</i>                                                | <i>prb1Δ::HIS3</i> | <i>opi1Δ::kan</i>        | <i>atg7Δ::hph</i>  | <i>Yiplac-ssGFPHDEL-NatMX6</i> | this study |
